# Supplementary material for: Evolution and objectives of diverse Australian recreational fisheries monitoring programs
Source: Springer Nature journal article supplement (doi:10.1007/s11160-025-09955-6), 2025-05-26
Supplement: MOESM1 [file 11160_2025_9955_MOESM1_ESM.pdf]

## Supplementary Materials

### Evolution and objectives of diverse Australian recreational fisheries monitoring programs

Sophie White<sup>1\*</sup>, Morgan Pratchett<sup>1</sup>, Amos Mapleston<sup>3</sup>, Reniel B. Cabral<sup>1,2\*</sup>

<sup>1</sup> College of Science and Engineering, James Cook University, Townsville, Australia

<sup>2</sup> Centre for Sustainable Tropical Fisheries and Aquaculture, James Cook University, Townsville, Australia

<sup>3</sup> Queensland Department of Primary Industries, Townsville, Australia

\*Corresponding authors.

Email:

Sophie White: sophie.white2@my.jcu.edu.au, ORCID Number: 0009-0000-1570-6071

Reniel B. Cabral: reniel.cabral@jcu.edu.au, ORCID Number: 0000-0002-1137-381X

**Supplementary Information Table 6:** Grouped recreational fisheries monitoring programs onsite and offsite classifications, and the associated definition based on classification.

| Grouped Program                  | Onsite vs Offsite | Definition                                                                                                                                                                                                                                                                                                   |
|----------------------------------|-------------------|--------------------------------------------------------------------------------------------------------------------------------------------------------------------------------------------------------------------------------------------------------------------------------------------------------------|
| Aerial Survey                    | Onsite            | Is a combination of access point and roving surveys, where an aircraft is used to conduct stratified random sampling. During this process counts of boats or anglers will be conducted to be able to estimate daily totals of fishing within a specified area.                                               |
| Angler Diary Survey              | Offsite           | Inclusion of Mail-back Surveys and Angler Diary programs, where fishing activity and harvest is recorded by recreational fishers and is sent back to fisheries personnel for monitoring.                                                                                                                     |
| Boat Ramp Surveys                | Onsite            | Inclusion of Boat Ramp Surveys and Bus-route/ Creel Surveys, where returning boat-based fishers will be surveyed on their fishing activity and catch. Information such as location fished, number of kept and released fish, methods, fish lengths is recorded within both surveys.                          |
| Charter Fishery Logbooks         | Offsite           | Where Charter Fishery Operators as part of mandatory reporting will record their fishing activity and harvest, which will be submitted to fisheries to monitor the charter and recreational fishing sector.                                                                                                  |
| Charter Fishery Observer Program | Onsite            | The Charter Fishery Observer Program collects harvest and activity information onboard charter fishery operators but will also collect biological information such as number of fish kept and released to a species level, length and occasionally age data from the extraction of otoliths (fish ear bones) |

|                                                  |         |                                                                                                                                                                                                                                                                                                                                                                                                                                                                                                                                                                                                                                                                                                                                                                                              |
|--------------------------------------------------|---------|----------------------------------------------------------------------------------------------------------------------------------------------------------------------------------------------------------------------------------------------------------------------------------------------------------------------------------------------------------------------------------------------------------------------------------------------------------------------------------------------------------------------------------------------------------------------------------------------------------------------------------------------------------------------------------------------------------------------------------------------------------------------------------------------|
| Donation Program                                 | Offsite | The inclusion of four programs from New South Wales (the Research Angler Program), Queensland (the Keen Angler Program), Tasmania (Framed Tagged and More), and Western Australia (Send Us Your Skeletons), where almost exclusively biological data will be retrieved. The donation of fish frames means that length, sex, and age data can be retrieved.                                                                                                                                                                                                                                                                                                                                                                                                                                   |
| Gamefish Angler Diary                            | Offsite | Exclusive to Tasmania the program had a diary mailed out to recreational fishers based on the participants in four different clubs. The process was voluntary in terms of participation and similar to the broader Angler Diary/ Mail-back survey process. The information of the trip/ day where the date, if fishing was part of competition, location, number of people fishing, methods, and the hours spent fishing for each trip/ day.                                                                                                                                                                                                                                                                                                                                                 |
| Game Fishing Monitoring Programs                 | Onsite  | The classification includes New South Wales Gamefish Tournament Monitoring Programs people, where estimates of gamefish fishing and the level of catch and effort data. The information is used to advise and answer questions regarding the sustainability and allocation of fishing opportunities. All information is collected through Sched Update- radio updates of the catch and associated information announced during Gamefish tournaments/ competitions. Additional 'Onsite Surveys' occur within this overarching program to collect data not announced during the Sched Updates.                                                                                                                                                                                                 |
| Game Fishing Tagging Program                     | Onsite  | During events such as that recorded in the 'Game Fishing Monitoring Programs,' the tagging program will collect biological information of game fish species caught in New South Wales. Some of the events will be exclusively tag-and-release programs where only select fish (trophy or point) will be kept. Distribution and size of fish will be recorded in these processes.                                                                                                                                                                                                                                                                                                                                                                                                             |
| Offshore and Game Fishing Onsite Survey          | Onsite  | Referred to as the Gamefish Boat Ramp Survey two main areas of Tasmanian will have the boat ramps sampled for offshore and game fishing that takes place. The methodologies of sampling within this program, is similar to the general 'Onsite Survey' and 'Boat Ramp Survey' but exclusively samples within the niche group of gamefish and offshore fisheries. These two boat ramps combined captured the majority of the offshore and game fishing that took place, essentially sampling the entire state's offshore and game fishing. This program includes the initial onsite survey which only sampled game fishing and then expanded to sample both offshore and game fishing. Was also conducted in conjunction with the initial 'Offshore and Game Fishing Telephone-diary Survey.' |
| Offshore and Game Fishing Telephone-diary Survey | Offsite | The process is similar to the broader 'Telephone-diary Survey' but will only sample offshore and gamefish fishers within Tasmania. Has instead been implemented to capture the level of offshore and game fishing within Tasmania. This program also includes the voluntary 'Charter Fishery Logbooks' that is administered to Tasmanian Charter Fishery Operators, to collect this data if they are willing to participate.                                                                                                                                                                                                                                                                                                                                                                 |

|                                     |         |                                                                                                                                                                                                                                                                                                                                                                                                                                                                                                                                                                                                               |
|-------------------------------------|---------|---------------------------------------------------------------------------------------------------------------------------------------------------------------------------------------------------------------------------------------------------------------------------------------------------------------------------------------------------------------------------------------------------------------------------------------------------------------------------------------------------------------------------------------------------------------------------------------------------------------|
| Onsite Survey                       | Onsite  | In a similar format as 'Boat Ramp Surveys,' however the recreational fishers surveyed are both shore- and boat-based fishers. Surveys included within this categorisation are 'Bus Route Access Point Surveys,' 'Roving Surveys,' and 'Onsite Surveys.' Information such as location fished, number of fish caught, kept and released, methods, and duration are recorded which is the same as 'Boat Ramp Surveys.' Methods differ between states.                                                                                                                                                            |
| Remote Camera Survey                | Onsite  | Using stationary camera's Western Australia has implemented this survey to monitor the amount of fishing effort taking place at the respective locations. Movement is detected at 5-minute intervals, where trained staff will determine the launch and retrieval time of fishers.                                                                                                                                                                                                                                                                                                                            |
| Satisfaction and Expectation Survey | Offsite | Includes both Community Satisfaction Surveys, and Satisfaction and Expectation Surveys from both Western Australia and Queensland. This included recreational fishers who had fished recently or in the last 12-months to complete questionnaires about the level and frequency of fishing, their expectation when fishing and their satisfaction with fishing. However, in Western Australia the questionnaires were conducted over the phone for a one month survey period. Queensland instead had their surveys distributed at tackle stores and participants were screened in person prior to the survey. |
| Telephone-diary Survey              | Offsite | The Telephone-diary Survey encompasses three different surveys within the one. It is composed of the 'Screening Survey,' 'Diary Survey,' and the 'Satisfaction and Expectation Survey.' During these three phases different recreational fishers are surveyed on their eligibility to participate, and all fishing activity over a 12-month period. Each state and territory that uses this program refers to it as the 'Telephone-diary Survey.'                                                                                                                                                             |

**Supplementary Information Table 7:** Summary of Grouped Programs initial objectives outlined within the literature and the grouped objectives used in the present review.

| State             | Grouped Programs    | Initial Objectives                   | Grouped Objectives                         |
|-------------------|---------------------|--------------------------------------|--------------------------------------------|
| Western Australia | Donation Program    | Age Representation                   | Age Representation                         |
| Western Australia | Donation Program    | Increase in Data                     | Increase in Data and Sector Representation |
| Western Australia | Donation Program    | Increase Recreational Representation | Increase in Data and Sector Representation |
| Western Australia | Donation Program    | Fish Length                          | Fish Length                                |
| Western Australia | Onsite Survey       | Catch Representation                 | Catch Representation                       |
| Western Australia | Onsite Survey       | Effort Representation                | Effort Representation                      |
| Western Australia | Onsite Survey       | Fish Length                          | Fish Length                                |
| Western Australia | Angler Diary Survey | Catch Representation                 | Catch Representation                       |
| Western Australia | Angler Diary Survey | Effort Representation                | Effort Representation                      |
| Western Australia | Angler Diary Survey | Socio-economic Information           | Socio-economic information                 |
| Western Australia | Angler Diary Survey | Effort Representation                | Effort Representation                      |
| Western Australia | Ariel Survey        | Complementation to other Programs    | Complementation to other Programs          |
| Western Australia | Boat Ramp Survey    | Weight Representation                | Weight Representation                      |
| Western Australia | Boat Ramp Survey    | Fish Length                          | Fish Length                                |
| Western Australia | Boat Ramp Survey    | Complementation to other Programs    | Catch Representation                       |
| Western Australia | Onsite Survey       | Catch Representation                 | Catch Representation                       |
| Western Australia | Onsite Survey       | Effort Representation                | Effort Representation                      |
| Western Australia | Onsite Survey       | Spatial Range                        | Spatial Representation                     |

|                   |                         |                                   |                                       |
|-------------------|-------------------------|-----------------------------------|---------------------------------------|
| Western Australia | Onsite Survey           | Fish Length                       | Fish Length                           |
| Western Australia | Charter Fishery Logbook | Catch Representation              | Catch Representation                  |
| Western Australia | Charter Fishery Logbook | Effort Representation             | Effort Representation                 |
| Western Australia | Charter Fishery Logbook | Assessment of Impacts             | Impact Assessment                     |
| Western Australia | Charter Fishery Logbook | Management Strategies             | Management strategies                 |
| Western Australia | Angler Diary Survey     | Spatial Range                     | Spatial Representation                |
| Western Australia | Angler Diary Survey     | Catch Representation              | Catch Representation                  |
| Western Australia | Angler Diary Survey     | Effort Representation             | Effort Representation                 |
| Western Australia | Angler Diary Survey     | Fisher Attitudes and Opinions     | Fisher Attitudes and Opinions         |
| Western Australia | Telephone-diary Survey  | Catch Representation              | Catch Representation                  |
| Western Australia | Telephone-diary Survey  | Effort Representation             | Effort Representation                 |
| Western Australia | Telephone-diary Survey  | Fisher Attitudes and Opinions     | Fisher Attitudes and Opinions         |
| Western Australia | Telephone-diary Survey  | Profiling Information             | Demographic and Profiling Information |
| Western Australia | Remote Camera Survey    | Effort Representation             | Effort Representation                 |
| Western Australia | Remote Camera Survey    | Complementation to other Programs | Complementation to other Programs     |
| Western Australia | Onsite Survey           | Catch Representation              | Catch Representation                  |
| Western Australia | Onsite Survey           | Effort Representation             | Effort Representation                 |
| New South Wales   | Telephone-diary Survey  | Catch Representation              | Catch Representation                  |
| New South Wales   | Telephone-diary Survey  | Effort Representation             | Effort Representation                 |

|                 |                                  |                                   |                                       |
|-----------------|----------------------------------|-----------------------------------|---------------------------------------|
| New South Wales | Telephone-diary Survey           | Profiling Information             | Demographic and Profiling Information |
| New South Wales | Telephone-diary Survey           | Fisher Attitudes and Opinions     | Fisher Attitudes and Opinions         |
| New South Wales | Telephone-diary Survey           | Spatial Range                     | Spatial Representation                |
| New South Wales | Telephone-diary Survey           | Participation Rates               | Effort Representation                 |
| New South Wales | Game fishing Monitoring Program  | Temporal Range                    | Temporal Range                        |
| New South Wales | Game fishing Monitoring Program  | Complementation to other Programs | Complementation to other Programs     |
| New South Wales | Charter Fishery Logbook          | Temporal Range                    | Temporal Range                        |
| New South Wales | Charter Fishery Logbook          | Spatial Range                     | Spatial Representation                |
| New South Wales | Charter Fishery Logbook          | Catch Representation              | Catch Representation                  |
| New South Wales | Charter Fishery Logbook          | Effort Representation             | Effort Representation                 |
| New South Wales | Charter Fishery Logbook          | Fish Length                       | Fish Length                           |
| New South Wales | Charter Fishery Logbook          | Post- Release/ Capture Condition  | Fish Condition                        |
| New South Wales | Charter Fishery Logbook          | Profiling Information             | Demographic and Profiling Information |
| New South Wales | Charter Fishery Observer Program | Spatial Range                     | Spatial Representation                |
| New South Wales | Charter Fishery Observer Program | Temporal Range                    | Temporal Range                        |
| New South Wales | Charter Fishery Observer Program | Catch Representation              | Catch Representation                  |
| New South Wales | Charter Fishery Observer Program | Effort Representation             | Effort Representation                 |
| New South Wales | Charter Fishery Observer Program | Fish Length                       | Fish Length                           |
| New South Wales | Donation Program                 | Age Representation                | Age Representation                    |

|                 |                             |                                   |                                       |
|-----------------|-----------------------------|-----------------------------------|---------------------------------------|
| New South Wales | Donation Program            | Fish Length                       | Fish Length                           |
| New South Wales | Donation Program            | Sex Data                          | Sex Data                              |
| New South Wales | Onsite Survey               | Catch Representation              | Catch Representation                  |
| New South Wales | Onsite Survey               | Effort Representation             | Effort Representation                 |
| New South Wales | Onsite Survey               | Complementation to other Programs | Complementation to other Programs     |
| New South Wales | Gamefishing Tagging Program | Fish Length                       | Fish Length                           |
| New South Wales | Gamefishing Tagging Program | Growth Representation             | Growth Representation                 |
| Queensland      | Telephone-diary Survey      | Catch Representation              | Catch Representation                  |
| Queensland      | Telephone-diary Survey      | Effort Representation             | Effort Representation                 |
| Queensland      | Telephone-diary Survey      | Profiling Information             | Demographic and Profiling Information |
| Queensland      | Telephone-diary Survey      | Fisher Attitudes and Opinions     | Fisher Attitudes and Opinions         |
| Queensland      | Boat Ramp Survey            | Catch Representation              | Catch Representation                  |
| Queensland      | Boat Ramp Survey            | Effort Representation             | Effort Representation                 |
| Queensland      | Boat Ramp Survey            | Temporal Range                    | Temporal Range                        |
| Queensland      | Boat Ramp Survey            | Fish Length                       | Fish Length                           |
| Queensland      | Donation Program            | Fish Length                       | Fish Length                           |
| Queensland      | Donation Program            | Age Representation                | Age Representation                    |
| Queensland      | Donation Program            | Complementation to other Programs | Complementation to other Programs     |
| Queensland      | Charter Fishery Logbook     | Fish Length                       | Fish Length                           |
| Queensland      | Charter Fishery Logbook     | Complementation to other Programs | Complementation to other Programs     |
| Queensland      | Onsite Survey               | Catch Representation              | Catch Representation                  |
| Queensland      | Onsite Survey               | Effort Representation             | Effort Representation                 |
| Queensland      | Onsite Survey               | Spatial Range                     | Spatial Representation                |
| Queensland      | Onsite Survey               | Temporal Range                    | Temporal Range                        |

|                 |                                     |                                                            |                                       |
|-----------------|-------------------------------------|------------------------------------------------------------|---------------------------------------|
| Queensland      | Satisfaction and Expectation Survey | Profiling Information                                      | Demographic and Profiling Information |
| Queensland      | Satisfaction and Expectation Survey | Fisher Attitudes and Opinions                              | Fisher Attitudes and Opinions         |
| Queensland      | Angler Diary Survey                 | Catch Representation                                       | Catch Representation                  |
| Queensland      | Angler Diary Survey                 | Effort Representation                                      | Effort Representation                 |
| South Australia | Telephone-diary Survey              | Catch Representation                                       | Catch Representation                  |
| South Australia | Telephone-diary Survey              | Effort Representation                                      | Effort Representation                 |
| South Australia | Telephone-diary Survey              | Profiling Information                                      | Demographic and Profiling Information |
| South Australia | Telephone-diary Survey              | Fisher Attitudes and Opinions                              | Fisher Attitudes and Opinions         |
| South Australia | Onsite Survey                       | Fish Length                                                | Fish Length                           |
| South Australia | Angler Diary Survey                 | Catch Representation                                       | Catch Representation                  |
| South Australia | Angler Diary Survey                 | Effort Representation                                      | Effort Representation                 |
| South Australia | Angler Diary Survey                 | Participation Rates                                        | Effort Representation                 |
| South Australia | Charter Fishery Logbook             | Fishing Activities                                         | Fishing Activity                      |
| South Australia | Charter Fishery Logbook             | Catch Representation                                       | Catch Representation                  |
| South Australia | Charter Fishery Logbook             | Effort Representation                                      | Effort Representation                 |
| South Australia | Charter Fishery Logbook             | Client participation                                       | Client Participation                  |
| South Australia | Charter Fishery Logbook             | Spatial dynamic                                            | Spatial Representation                |
| South Australia | Charter Fishery Logbook             | Interaction with Threatened, Endangered, Protected Species | Impact Assessment                     |
| Tasmania        | Telephone-diary Survey              | Spatial Range                                              | Spatial Representation                |
| Tasmania        | Telephone-diary Survey              | Profiling Information                                      | Demographic and Profiling Information |
| Tasmania        | Telephone-diary Survey              | Participation Rates                                        | Effort Representation                 |



|          |                                                   |                                   |                                   |
|----------|---------------------------------------------------|-----------------------------------|-----------------------------------|
| Tasmania | Telephone-diary Survey                            | Catch Representation              | Catch Representation              |
| Tasmania | Telephone-diary Survey                            | Effort Representation             | Effort Representation             |
| Tasmania | Telephone-diary Survey                            | Economic Information              | Socio-economic information        |
| Tasmania | Telephone-diary Survey                            | Temporal Range                    | Temporal Range                    |
| Tasmania | Onsite Survey                                     | Fish Length                       | Fish Length                       |
| Tasmania | Games fishing and Offshore Telephone-diary Survey | Effort Representation             | Effort Representation             |
| Tasmania | Games fishing and Offshore Telephone-diary Survey | Catch Representation              | Catch Representation              |
| Tasmania | Games fishing and Offshore Telephone-diary Survey | Fisher Attitudes and Opinions     | Fisher Attitudes and Opinions     |
| Tasmania | Charter Fishery Logbook                           | Effort Representation             | Effort Representation             |
| Tasmania | Charter Fishery Logbook                           | Catch Representation              | Catch Representation              |
| Tasmania | Charter Fishery Logbook                           | Predation Assessment              | Impact Assessment                 |
| Tasmania | Offshore and Game fishing Onsite Survey           | Catch Representation              | Catch Representation              |
| Tasmania | Gamefishing Angler Diary                          | Catch Representation              | Catch Representation              |
| Tasmania | Offshore and Game fishing Onsite Survey           | Effort Representation             | Effort Representation             |
| Tasmania | Gamefishing Angler Diary                          | Effort Representation             | Effort Representation             |
| Tasmania | Offshore and Game fishing Onsite Survey           | Fish Length                       | Fish Length                       |
| Tasmania | Offshore and Gamefishing Onsite Survey            | Weight Representation             | Weight Representation             |
| Tasmania | Charter Fishery Logbook                           | Weight Representation             | Weight Representation             |
| Tasmania | Angler Diary Survey                               | Catch Representation              | Catch Representation              |
| Tasmania | Angler Diary Survey                               | Effort Representation             | Effort Representation             |
| Tasmania | Donation Program                                  | Fish Length                       | Fish Length                       |
| Tasmania | Donation Program                                  | Age Representation                | Age Representation                |
| Tasmania | Donation Program                                  | Complementation to other Programs | Complementation to other Programs |

|                    |                         |                                   |                                       |
|--------------------|-------------------------|-----------------------------------|---------------------------------------|
| Northern Territory | Telephone-diary Survey  | Profiling Information             | Demographic and Profiling Information |
| Northern Territory | Telephone-diary Survey  | Economic Information              | Socio-economic information            |
| Northern Territory | Telephone-diary Survey  | Catch Representation              | Catch Representation                  |
| Northern Territory | Telephone-diary Survey  | Effort Representation             | Effort Representation                 |
| Northern Territory | Onsite Survey           | Visitor Information               | Visitor Information                   |
| Northern Territory | Onsite Survey           | Catch Representation              | Catch Representation                  |
| Northern Territory | Onsite Survey           | Effort Representation             | Effort Representation                 |
| Northern Territory | Onsite Survey           | Complementation to other Programs | Complementation to other Programs     |
| Northern Territory | Charter Fishery Logbook | Complementation to other Programs | Complementation to other Programs     |
| Northern Territory | Charter Fishery Logbook | Maintaining Sustainability        | Maintaining Sustainability            |
| Northern Territory | Onsite Survey           | Identification Skills             | Client Participation                  |
| Victoria           | Telephone-diary Survey  | Catch Representation              | Catch Representation                  |
| Victoria           | Telephone-diary Survey  | Effort Representation             | Effort Representation                 |
| Victoria           | Onsite Survey           | Complementation to other Programs | Complementation to other Programs     |
| Victoria           | Onsite Survey           | Behavioural differences           | Participant Behavioural Differences   |
| Victoria           | Angler Diary Survey     | Temporal Range                    | Temporal Range                        |
| Victoria           | Angler Diary Survey     | Catch Representation              | Catch Representation                  |
| Victoria           | Angler Diary Survey     | Fish Length                       | Fish Length                           |
| Victoria           | Angler Diary Survey     | Age Representation                | Age Representation                    |
| Victoria           | Angler Diary Survey     | Spatial Range                     | Spatial Representation                |
| Victoria           | Angler Diary Survey     | Management Strategies             | Management strategies                 |
| Victoria           | Boat Ramp Survey        | Catch Representation              | Catch Representation                  |
| Victoria           | Boat Ramp Survey        | Spatial Range                     | Spatial Representation                |
| Victoria           | Boat Ramp Survey        | Temporal Range                    | Temporal Range                        |

|          |                     |                            |                            |
|----------|---------------------|----------------------------|----------------------------|
| Victoria | Angler Diary Survey | Maintaining Sustainability | Maintaining Sustainability |
| Victoria | Boat Ramp Survey    | Effort Representation      | Effort Representation      |
